# Supplementary material for: Changes in the outer nuclear layer and choroidal vascularity during the manifest and quiescent phases of acute central serous chorioretinopathy
Source: PubMed Central journal article supplement (PMC11239832; doi:10.1038/s41598-024-67012-x), 2024-07-11
Supplement: 41598_2024_67012_MOESM1_ESM.pdf [file 41598_2024_67012_MOESM1_ESM.pdf]

**Table S1. Comparison of central serous chorioretinopathy eyes treated with anti-VEGF and without anti-VEGF injection**

|                                      | <b>With anti-VEGF</b> | <b>Observation</b> | <b>p value</b> |
|--------------------------------------|-----------------------|--------------------|----------------|
| <b>Total number (eyes)</b>           | 30                    | 31                 |                |
| <b>Spherical equivalent (D)</b>      | 0.06 ± 2.17           | -0.30 ± 1.05       | 0.410          |
| <b>Visual acuity (logMAR)</b>        |                       |                    |                |
| <i>Baseline (manifest status)</i>    | 0.26 ± 0.22           | 0.20 ± 0.22        | 0.343          |
| <i>Resolution (quiescent status)</i> | 0.11 ± 0.14           | 0.07 ± 0.09        | 0.137          |
| <b>ONL thickness (µm)</b>            |                       |                    |                |
| <i>Baseline (manifest status)</i>    | 49.5 ± 14.7           | 54.0 ± 15.2        | 0.247          |
| <i>Resolution (quiescent status)</i> | 65.7 ± 18.3           | 75.8 ± 20.8        | 0.047          |
| <b>Choroidal thickness (µm)</b>      |                       |                    |                |
| <i>Baseline (manifest status)</i>    | 370.5 ± 109.7         | 357.5 ± 88.1       | 0.777          |
| <i>Resolution (quiescent status)</i> | 307.2 ± 97.7          | 306.0 ± 97.8       | 0.963          |
| <b>CVI –EC (%)</b>                   |                       |                    |                |
| <i>Baseline (manifest status)</i>    | 69.02 ± 2.87          | 68.73 ± 3.48       | 0.720          |
| <i>Resolution (quiescent status)</i> | 71.59 ± 3.08          | 71.62 ± 3.22       | 0.973          |
| <b>CVI – 1500 (%)</b>                |                       |                    |                |
| <i>Baseline (manifest status)</i>    | 69.70 ± 3.03          | 68.92 ± 6.01       | 0.610          |
| <i>Resolution (quiescent status)</i> | 73.52 ± 3.81          | 72.02 ± 5.78       | 0.374          |

VEGF, vascular endothelial growth factor; logMAR, logarithm of maximum angle resolution; ONL, outer nuclear layer; CVI-EC, choroidal vascularity index of the entire choroid; CVI-1500, choroidal vascularity index of the leaking point 1500µm area

Focal laser photocoagulation and photodynamic therapy were excluded from this analysis due to the limited number of cases (4 and 0 eyes, respectively).
